# Supplementary material for: Pyronaridine as a Bromodomain-Containing Protein 4-N-Terminal Bromodomain (BRD4-BD1) Inhibitor: In Silico Database Mining, Molecular Docking, and Molecular Dynamics Simulation
Source: MDPI journal article supplement (doi:10.3390/molecules28155713), 2023-07-28
Supplement: s1 [file s1]

**Table S1.** Evaluated standard docking scores (in kcal/mol) for the investigated compounds with docking scores less than  $-7.0$  kcal/mol against the BRD4-BD1 (Exhaustiveness number = 50).

| No. | SuperDRUG2 Code | Standard Docking Score (kcal/mol) | No. | SuperDRUG2 Code | Standard Docking Score (kcal/mol) | No. | SuperDRUG2 Code | Standard Docking Score (kcal/mol) |
|-----|-----------------|-----------------------------------|-----|-----------------|-----------------------------------|-----|-----------------|-----------------------------------|
|     | <b>R6S</b>      | <b>-9.9</b>                       | 48  | SD003836        | -9.1                              | 96  | SD000605        | -8.9                              |
| 1   | SD003509        | -10.1                             | 49  | SD006034        | -9.1                              | 97  | SD000929        | -8.8                              |
| 2   | SD003873        | -10.1                             | 50  | SD000645        | -9.1                              | 98  | SD000896        | -8.8                              |
| 3   | SD006001        | -9.9                              | 51  | SD000946        | -9.0                              | 99  | SD000863        | -8.8                              |
| 4   | SD003842        | -9.8                              | 52  | SD001084        | -9.0                              | 100 | SD001074        | -8.8                              |
| 5   | SD000497        | -9.8                              | 53  | SD003217        | -9.0                              | 101 | SD001051        | -8.8                              |
| 6   | SD001949        | -9.7                              | 54  | SD001678        | -9.0                              | 102 | SD001271        | -8.8                              |
| 7   | SD003490        | -9.7                              | 55  | SD000012        | -9.0                              | 103 | SD001279        | -8.8                              |
| 8   | SD000062        | -9.7                              | 56  | SD001987        | -9.0                              | 104 | SD001274        | -8.8                              |
| 9   | SD000944        | -9.6                              | 57  | SD002471        | -9.0                              | 105 | SD000140        | -8.8                              |
| 10  | SD001524        | -9.6                              | 58  | SD000265        | -9.0                              | 106 | SD000146        | -8.8                              |
| 11  | SD002150        | -9.6                              | 59  | SD000306        | -9.0                              | 107 | SD001638        | -8.8                              |
| 12  | SD002280        | -9.6                              | 60  | SD000330        | -9.0                              | 108 | SD001367        | -8.8                              |
| 13  | SD003376        | -9.6                              | 61  | SD002620        | -9.0                              | 109 | SD001865        | -8.8                              |
| 14  | SD003145        | -9.6                              | 62  | SD003573        | -9.0                              | 110 | SD001599        | -8.8                              |
| 15  | SD003291        | -9.5                              | 63  | SD003749        | -9.0                              | 111 | SD002051        | -8.8                              |
| 16  | SD002790        | -9.5                              | 64  | SD003802        | -9.0                              | 112 | SD002114        | -8.8                              |
| 17  | SD000943        | -9.4                              | 65  | SD003939        | -9.0                              | 113 | SD002115        | -8.8                              |
| 18  | SD001942        | -9.4                              | 66  | SD000412        | -9.0                              | 114 | SD002322        | -8.8                              |
| 19  | SD002303        | -9.4                              | 67  | SD000414        | -9.0                              | 115 | SD002506        | -8.8                              |
| 20  | SD002172        | -9.4                              | 68  | SD000719        | -9.0                              | 116 | SD002417        | -8.8                              |
| 21  | SD002496        | -9.4                              | 69  | SD000709        | -9.0                              | 117 | SD002582        | -8.8                              |
| 22  | SD000686        | -9.4                              | 70  | SD000839        | -9.0                              | 118 | SD002800        | -8.8                              |
| 23  | SD000883        | -9.3                              | 71  | SD000858        | -8.9                              | 119 | SD003415        | -8.8                              |
| 24  | SD003224        | -9.3                              | 72  | SD001004        | -8.9                              | 120 | SD003151        | -8.8                              |
| 25  | SD003820        | -9.3                              | 73  | SD001347        | -8.9                              | 121 | SD003543        | -8.8                              |
| 26  | SD003943        | -9.3                              | 74  | SD001419        | -8.9                              | 122 | SD003714        | -8.8                              |
| 27  | SD006014        | -9.3                              | 75  | SD001471        | -8.9                              | 123 | SD003791        | -8.8                              |
| 28  | SD001640        | -9.2                              | 76  | SD001406        | -8.9                              | 124 | SD003876        | -8.8                              |
| 29  | SD003076        | -9.2                              | 77  | SD001705        | -8.9                              | 125 | SD003905        | -8.8                              |
| 30  | SD002297        | -9.2                              | 78  | SD001634        | -8.9                              | 126 | SD003930        | -8.8                              |
| 31  | SD003363        | -9.2                              | 79  | SD000168        | -8.9                              | 127 | SD000575        | -8.8                              |
| 32  | SD002572        | -9.2                              | 80  | SD001727        | -8.9                              | 128 | SD000691        | -8.8                              |
| 33  | SD003570        | -9.2                              | 81  | SD001623        | -8.9                              | 129 | SD000671        | -8.8                              |
| 34  | SD003940        | -9.2                              | 82  | SD001776        | -8.9                              | 130 | SD000735        | -8.8                              |
| 35  | SD000554        | -9.2                              | 83  | SD000199        | -8.9                              | 131 | SD000895        | -8.7                              |
| 36  | SD000846        | -9.2                              | 84  | SD002006        | -8.9                              | 132 | SD000949        | -8.7                              |
| 37  | SD001057        | -9.1                              | 85  | SD003341        | -8.9                              | 133 | SD001025        | -8.7                              |
| 38  | SD001459        | -9.1                              | 86  | SD002373        | -8.9                              | 134 | SD001468        | -8.7                              |
| 39  | SD001505        | -9.1                              | 87  | SD002633        | -8.9                              | 135 | SD001854        | -8.7                              |
| 40  | SD001644        | -9.1                              | 88  | SD002712        | -8.9                              | 136 | SD001910        | -8.7                              |
| 41  | SD001676        | -9.1                              | 89  | SD002713        | -8.9                              | 137 | SD002027        | -8.7                              |
| 42  | SD001713        | -9.1                              | 90  | SD003034        | -8.9                              | 138 | SD002123        | -8.7                              |
| 43  | SD001824        | -9.1                              | 91  | SD003738        | -8.9                              | 139 | SD002218        | -8.7                              |
| 44  | SD002018        | -9.1                              | 92  | SD003901        | -8.9                              | 140 | SD002702        | -8.7                              |
| 45  | SD003347        | -9.1                              | 93  | SD003895        | -8.9                              | 141 | SD003385        | -8.7                              |
| 46  | SD002327        | -9.1                              | 94  | SD006006        | -8.9                              | 142 | SD003400        | -8.7                              |
| 47  | SD003350        | -9.1                              | 95  | SD006007        | -8.9                              | 143 | SD003127        | -8.7                              |

Table S1. Continued.

| No. | SuperDRUG2<br>Code | Standard<br>Docking<br>Score<br>(kcal/mol) | No. | SuperDRUG2<br>Code | Standard<br>Docking<br>Score<br>(kcal/mol) | No. | SuperDRUG2<br>Code | Standard<br>Docking<br>Score<br>(kcal/mol) |
|-----|--------------------|--------------------------------------------|-----|--------------------|--------------------------------------------|-----|--------------------|--------------------------------------------|
| 144 | SD003706           | -8.7                                       | 192 | SD001104           | -8.5                                       | 240 | SD000188           | -8.4                                       |
| 145 | SD003764           | -8.7                                       | 193 | SD001160           | -8.5                                       | 241 | SD001915           | -8.4                                       |
| 146 | SD003908           | -8.7                                       | 194 | SD001156           | -8.5                                       | 242 | SD001954           | -8.4                                       |
| 147 | SD006052           | -8.7                                       | 195 | SD001534           | -8.5                                       | 243 | SD001982           | -8.4                                       |
| 148 | SD003937           | -8.7                                       | 196 | SD001481           | -8.5                                       | 244 | SD002024           | -8.4                                       |
| 149 | SD000438           | -8.7                                       | 197 | SD001564           | -8.5                                       | 245 | SD001969           | -8.4                                       |
| 150 | SD000495           | -8.7                                       | 198 | SD001602           | -8.5                                       | 246 | SD002106           | -8.4                                       |
| 151 | SD000606           | -8.7                                       | 199 | SD001688           | -8.5                                       | 247 | SD002007           | -8.4                                       |
| 152 | SD000674           | -8.7                                       | 200 | SD001617           | -8.5                                       | 248 | SD000206           | -8.4                                       |
| 153 | SD000725           | -8.7                                       | 201 | SD001858           | -8.5                                       | 249 | SD003306           | -8.4                                       |
| 154 | SD000928           | -8.6                                       | 202 | SD000192           | -8.5                                       | 250 | SD002182           | -8.4                                       |
| 155 | SD000952           | -8.6                                       | 203 | SD002098           | -8.5                                       | 251 | SD002207           | -8.4                                       |
| 156 | SD001048           | -8.6                                       | 204 | SD002133           | -8.5                                       | 252 | SD002145           | -8.4                                       |
| 157 | SD001107           | -8.6                                       | 205 | SD002120           | -8.5                                       | 253 | SD000222           | -8.4                                       |
| 158 | SD000145           | -8.6                                       | 206 | SD002129           | -8.5                                       | 254 | SD002277           | -8.4                                       |
| 159 | SD001575           | -8.6                                       | 207 | SD002200           | -8.5                                       | 255 | SD002287           | -8.4                                       |
| 160 | SD001551           | -8.6                                       | 208 | SD002255           | -8.5                                       | 256 | SD003353           | -8.4                                       |
| 161 | SD000176           | -8.6                                       | 209 | SD003337           | -8.5                                       | 257 | SD002559           | -8.4                                       |
| 162 | SD001849           | -8.6                                       | 210 | SD002345           | -8.5                                       | 258 | SD002593           | -8.4                                       |
| 163 | SD003273           | -8.6                                       | 211 | SD002441           | -8.5                                       | 259 | SD002740           | -8.4                                       |
| 164 | SD002045           | -8.6                                       | 212 | SD002510           | -8.5                                       | 260 | SD003407           | -8.4                                       |
| 165 | SD002108           | -8.6                                       | 213 | SD000261           | -8.5                                       | 261 | SD002708           | -8.4                                       |
| 166 | SD002192           | -8.6                                       | 214 | SD002760           | -8.5                                       | 262 | SD002534           | -8.4                                       |
| 167 | SD002225           | -8.6                                       | 215 | SD003417           | -8.5                                       | 263 | SD003413           | -8.4                                       |
| 168 | SD000225           | -8.6                                       | 216 | SD003044           | -8.5                                       | 264 | SD003439           | -8.4                                       |
| 169 | SD002323           | -8.6                                       | 217 | SD003545           | -8.5                                       | 265 | SD003093           | -8.4                                       |
| 170 | SD002845           | -8.6                                       | 218 | SD003515           | -8.5                                       | 266 | SD000308           | -8.4                                       |
| 171 | SD003412           | -8.6                                       | 219 | SD000351           | -8.5                                       | 267 | SD000315           | -8.4                                       |
| 172 | SD003052           | -8.6                                       | 220 | SD003778           | -8.5                                       | 268 | SD003531           | -8.4                                       |
| 173 | SD003103           | -8.6                                       | 221 | SD003857           | -8.5                                       | 269 | SD003596           | -8.4                                       |
| 174 | SD003487           | -8.6                                       | 222 | SD003878           | -8.5                                       | 270 | SD003622           | -8.4                                       |
| 175 | SD003497           | -8.6                                       | 223 | SD006047           | -8.5                                       | 271 | SD003624           | -8.4                                       |
| 176 | SD003643           | -8.6                                       | 224 | SD003711           | -8.5                                       | 272 | SD003716           | -8.4                                       |
| 177 | SD003818           | -8.6                                       | 225 | SD000574           | -8.5                                       | 273 | SD003774           | -8.4                                       |
| 178 | SD003828           | -8.6                                       | 226 | SD000724           | -8.5                                       | 274 | SD003813           | -8.4                                       |
| 179 | SD003854           | -8.6                                       | 227 | SD000968           | -8.4                                       | 275 | SD003767           | -8.4                                       |
| 180 | SD006050           | -8.6                                       | 228 | SD003175           | -8.4                                       | 276 | SD003941           | -8.4                                       |
| 181 | SD000447           | -8.6                                       | 229 | SD000983           | -8.4                                       | 277 | SD006036           | -8.4                                       |
| 182 | SD000660           | -8.6                                       | 230 | SD001068           | -8.4                                       | 278 | SD000057           | -8.4                                       |
| 183 | SD000700           | -8.6                                       | 231 | SD001095           | -8.4                                       | 280 | SD006013           | -8.4                                       |
| 184 | SD000726           | -8.6                                       | 232 | SD000119           | -8.4                                       | 281 | SD000404           | -8.4                                       |
| 185 | SD000874           | -8.5                                       | 233 | SD001313           | -8.4                                       | 282 | SD000407           | -8.4                                       |
| 186 | SD000855           | -8.5                                       | 234 | SD001489           | -8.4                                       | 283 | SD000448           | -8.4                                       |
| 187 | SD000856           | -8.5                                       | 235 | SD003242           | -8.4                                       | 279 | SD000702           | -8.4                                       |
| 188 | SD001002           | -8.5                                       | 236 | SD000158           | -8.4                                       | 284 | SD000699           | -8.4                                       |
| 189 | SD001015           | -8.5                                       | 237 | SD003264           | -8.4                                       | 285 | SD000816           | -8.4                                       |
| 190 | SD001033           | -8.5                                       | 238 | SD001683           | -8.4                                       | 286 | SD000782           | -8.4                                       |
| 191 | SD000105           | -8.5                                       | 239 | SD001802           | -8.4                                       | 287 | SD000787           | -8.4                                       |

Table S1. Continued.

| No. | SuperDRUG2<br>Code | Standard<br>Docking<br>Score<br>(kcal/mol) | No. | SuperDRUG2<br>Code | Standard<br>Docking<br>Score<br>(kcal/mol) | No. | SuperDRUG2<br>Code | Standard<br>Docking<br>Score<br>(kcal/mol) |
|-----|--------------------|--------------------------------------------|-----|--------------------|--------------------------------------------|-----|--------------------|--------------------------------------------|
| 288 | SD000867           | -8.3                                       | 336 | SD006011           | -8.3                                       | 384 | SD002179           | -8.2                                       |
| 289 | SD000966           | -8.3                                       | 337 | SD000076           | -8.3                                       | 385 | SD001668           | -8.2                                       |
| 290 | SD000994           | -8.3                                       | 338 | SD000410           | -8.3                                       | 386 | SD002188           | -8.2                                       |
| 291 | SD001052           | -8.3                                       | 339 | SD000413           | -8.3                                       | 387 | SD002269           | -8.2                                       |
| 292 | SD003180           | -8.3                                       | 340 | SD000564           | -8.3                                       | 388 | SD002190           | -8.2                                       |
| 293 | SD001001           | -8.3                                       | 341 | SD000567           | -8.3                                       | 389 | SD002305           | -8.2                                       |
| 294 | SD001158           | -8.3                                       | 342 | SD000662           | -8.3                                       | 390 | SD003362           | -8.2                                       |
| 295 | SD001228           | -8.3                                       | 343 | SD000703           | -8.3                                       | 391 | SD002460           | -8.2                                       |
| 296 | SD001153           | -8.3                                       | 344 | SD000783           | -8.3                                       | 392 | SD002448           | -8.2                                       |
| 297 | SD001157           | -8.3                                       | 345 | SD000790           | -8.3                                       | 393 | SD002470           | -8.2                                       |
| 298 | SD001445           | -8.3                                       | 346 | SD000848           | -8.2                                       | 394 | SD002575           | -8.2                                       |
| 299 | SD001467           | -8.3                                       | 347 | SD000097           | -8.2                                       | 395 | SD002561           | -8.2                                       |
| 300 | SD003226           | -8.3                                       | 348 | SD001100           | -8.2                                       | 396 | SD003382           | -8.2                                       |
| 301 | SD001578           | -8.3                                       | 349 | SD000091           | -8.2                                       | 397 | SD002733           | -8.2                                       |
| 302 | SD001580           | -8.3                                       | 350 | SD001161           | -8.2                                       | 398 | SD003405           | -8.2                                       |
| 303 | SD001571           | -8.3                                       | 351 | SD001154           | -8.2                                       | 399 | SD002795           | -8.2                                       |
| 304 | SD003262           | -8.3                                       | 352 | SD001236           | -8.2                                       | 400 | SD002773           | -8.2                                       |
| 305 | SD001807           | -8.3                                       | 353 | SD001319           | -8.2                                       | 401 | SD002782           | -8.2                                       |
| 306 | SD001852           | -8.3                                       | 354 | SD000127           | -8.2                                       | 402 | SD002895           | -8.2                                       |
| 307 | SD001818           | -8.3                                       | 355 | SD001409           | -8.2                                       | 403 | SD002932           | -8.2                                       |
| 308 | SD001885           | -8.3                                       | 356 | SD001412           | -8.2                                       | 404 | SD003419           | -8.2                                       |
| 309 | SD001893           | -8.3                                       | 357 | SD001374           | -8.2                                       | 405 | SD003016           | -8.2                                       |
| 310 | SD001939           | -8.3                                       | 358 | SD001416           | -8.2                                       | 406 | SD003438           | -8.2                                       |
| 311 | SD002088           | -8.3                                       | 359 | SD001447           | -8.2                                       | 407 | SD003132           | -8.2                                       |
| 312 | SD002105           | -8.3                                       | 360 | SD001278           | -8.2                                       | 408 | SD000312           | -8.2                                       |
| 313 | SD002186           | -8.3                                       | 361 | SD001515           | -8.2                                       | 409 | SD003505           | -8.2                                       |
| 314 | SD000214           | -8.3                                       | 362 | SD001604           | -8.2                                       | 410 | SD003488           | -8.2                                       |
| 315 | SD002189           | -8.3                                       | 363 | SD001675           | -8.2                                       | 411 | SD000328           | -8.2                                       |
| 316 | SD002170           | -8.3                                       | 364 | SD001711           | -8.2                                       | 412 | SD003615           | -8.2                                       |
| 317 | SD002459           | -8.3                                       | 365 | SD001658           | -8.2                                       | 413 | SD003701           | -8.2                                       |
| 318 | SD002436           | -8.3                                       | 366 | SD001635           | -8.2                                       | 414 | SD003688           | -8.2                                       |
| 319 | SD002524           | -8.3                                       | 367 | SD001762           | -8.2                                       | 415 | SD003776           | -8.2                                       |
| 320 | SD000249           | -8.3                                       | 368 | SD001111           | -8.2                                       | 416 | SD000361           | -8.2                                       |
| 321 | SD002734           | -8.3                                       | 369 | SD001763           | -8.2                                       | 417 | SD003832           | -8.2                                       |
| 322 | SD002850           | -8.3                                       | 370 | SD001820           | -8.2                                       | 418 | SD003883           | -8.2                                       |
| 323 | SD003020           | -8.3                                       | 371 | SD001859           | -8.2                                       | 419 | SD003945           | -8.2                                       |
| 324 | SD002963           | -8.3                                       | 372 | SD001889           | -8.2                                       | 420 | SD000068           | -8.2                                       |
| 325 | SD000320           | -8.3                                       | 373 | SD001909           | -8.2                                       | 421 | SD000386           | -8.2                                       |
| 326 | SD000326           | -8.3                                       | 374 | SD001933           | -8.2                                       | 422 | SD000582           | -8.2                                       |
| 327 | SD003547           | -8.3                                       | 375 | SD001965           | -8.2                                       | 423 | SD000609           | -8.2                                       |
| 328 | SD003549           | -8.3                                       | 376 | SD002014           | -8.2                                       | 424 | SD000652           | -8.2                                       |
| 329 | SD003703           | -8.3                                       | 377 | SD003303           | -8.2                                       | 425 | SD000781           | -8.2                                       |
| 330 | SD000358           | -8.3                                       | 378 | SD003301           | -8.2                                       | 426 | SD000840           | -8.2                                       |
| 331 | SD003814           | -8.3                                       | 379 | SD002082           | -8.2                                       | 427 | SD000796           | -8.2                                       |
| 332 | SD003796           | -8.3                                       | 380 | SD000208           | -8.2                                       | 428 | SD000945           | -8.1                                       |
| 333 | SD003835           | -8.3                                       | 381 | SD002157           | -8.2                                       | 429 | SD000989           | -8.1                                       |
| 334 | SD003900           | -8.3                                       | 382 | SD002116           | -8.2                                       | 430 | SD001044           | -8.1                                       |
| 335 | SD003769           | -8.3                                       | 383 | SD003320           | -8.2                                       | 431 | SD001054           | -8.1                                       |

Table S1. Continued.

| No. | SuperDRUG2<br>Code | Standard<br>Docking<br>Score<br>(kcal/mol) | No. | SuperDRUG2<br>Code | Standard<br>Docking<br>Score<br>(kcal/mol) | No. | SuperDRUG2<br>Code | Standard<br>Docking<br>Score<br>(kcal/mol) |
|-----|--------------------|--------------------------------------------|-----|--------------------|--------------------------------------------|-----|--------------------|--------------------------------------------|
| 432 | SD001090           | -8.1                                       | 480 | SD000273           | -8.1                                       | 528 | SD000151           | -8.0                                       |
| 433 | SD001159           | -8.1                                       | 481 | SD002826           | -8.1                                       | 529 | SD001366           | -8.0                                       |
| 434 | SD000942           | -8.1                                       | 482 | SD002779           | -8.1                                       | 530 | SD001680           | -8.0                                       |
| 435 | SD001170           | -8.1                                       | 483 | SD003434           | -8.1                                       | 531 | SD001689           | -8.0                                       |
| 436 | SD003184           | -8.1                                       | 484 | SD000307           | -8.1                                       | 532 | SD001682           | -8.0                                       |
| 437 | SD001200           | -8.1                                       | 485 | SD000310           | -8.1                                       | 533 | SD001712           | -8.0                                       |
| 438 | SD001260           | -8.1                                       | 486 | SD003387           | -8.1                                       | 534 | SD001756           | -8.0                                       |
| 439 | SD001335           | -8.1                                       | 487 | SD003581           | -8.1                                       | 535 | SD001783           | -8.0                                       |
| 440 | SD001395           | -8.1                                       | 488 | SD003631           | -8.1                                       | 536 | SD001751           | -8.0                                       |
| 441 | SD001420           | -8.1                                       | 489 | SD003626           | -8.1                                       | 537 | SD001822           | -8.0                                       |
| 442 | SD001512           | -8.1                                       | 490 | SD000352           | -8.1                                       | 538 | SD001946           | -8.0                                       |
| 443 | SD001516           | -8.1                                       | 491 | SD003772           | -8.1                                       | 539 | SD001955           | -8.0                                       |
| 444 | SD001584           | -8.1                                       | 492 | SD003719           | -8.1                                       | 540 | SD001872           | -8.0                                       |
| 445 | SD003243           | -8.1                                       | 493 | SD003720           | -8.1                                       | 541 | SD003289           | -8.0                                       |
| 446 | SD001179           | -8.1                                       | 494 | SD003794           | -8.1                                       | 542 | SD002022           | -8.0                                       |
| 447 | SD001706           | -8.1                                       | 495 | SD000359           | -8.1                                       | 543 | SD003309           | -8.0                                       |
| 448 | SD001754           | -8.1                                       | 496 | SD003862           | -8.1                                       | 544 | SD002009           | -8.0                                       |
| 449 | SD000178           | -8.1                                       | 497 | SD006027           | -8.1                                       | 545 | SD002084           | -8.0                                       |
| 450 | SD001801           | -8.1                                       | 498 | SD003931           | -8.1                                       | 546 | SD002117           | -8.0                                       |
| 451 | SD003270           | -8.1                                       | 499 | SD006051           | -8.1                                       | 547 | SD003325           | -8.0                                       |
| 452 | SD000190           | -8.1                                       | 500 | SD000546           | -8.1                                       | 548 | SD002208           | -8.0                                       |
| 453 | SD001766           | -8.1                                       | 501 | SD000623           | -8.1                                       | 549 | SD002274           | -8.0                                       |
| 454 | SD001937           | -8.1                                       | 502 | SD000470           | -8.1                                       | 550 | SD002254           | -8.0                                       |
| 455 | SD001961           | -8.1                                       | 503 | SD000471           | -8.1                                       | 551 | SD003346           | -8.0                                       |
| 456 | SD002010           | -8.1                                       | 504 | SD000710           | -8.1                                       | 552 | SD002278           | -8.0                                       |
| 457 | SD002019           | -8.1                                       | 505 | SD000770           | -8.1                                       | 553 | SD000226           | -8.0                                       |
| 458 | SD002015           | -8.1                                       | 506 | SD000870           | -8.0                                       | 554 | SD002298           | -8.0                                       |
| 459 | SD002053           | -8.1                                       | 507 | SD000865           | -8.0                                       | 555 | SD003329           | -8.0                                       |
| 460 | SD002058           | -8.1                                       | 508 | SD000991           | -8.0                                       | 556 | SD002421           | -8.0                                       |
| 461 | SD001831           | -8.1                                       | 509 | SD000996           | -8.0                                       | 557 | SD002476           | -8.0                                       |
| 462 | SD000210           | -8.1                                       | 510 | SD001036           | -8.0                                       | 558 | SD003355           | -8.0                                       |
| 463 | SD002195           | -8.1                                       | 511 | SD001043           | -8.0                                       | 559 | SD002681           | -8.0                                       |
| 464 | SD002271           | -8.1                                       | 512 | SD001046           | -8.0                                       | 560 | SD002586           | -8.0                                       |
| 465 | SD003345           | -8.1                                       | 513 | SD000948           | -8.0                                       | 561 | SD002690           | -8.0                                       |
| 466 | SD002289           | -8.1                                       | 514 | SD001080           | -8.0                                       | 562 | SD002718           | -8.0                                       |
| 467 | SD002339           | -8.1                                       | 515 | SD001102           | -8.0                                       | 563 | SD002698           | -8.0                                       |
| 468 | SD002388           | -8.1                                       | 516 | SD001143           | -8.0                                       | 564 | SD002699           | -8.0                                       |
| 469 | SD003354           | -8.1                                       | 517 | SD003191           | -8.0                                       | 565 | SD002759           | -8.0                                       |
| 470 | SD002438           | -8.1                                       | 518 | SD001162           | -8.0                                       | 566 | SD002859           | -8.0                                       |
| 471 | SD002440           | -8.1                                       | 519 | SD000112           | -8.0                                       | 567 | SD000278           | -8.0                                       |
| 472 | SD000241           | -8.1                                       | 520 | SD001155           | -8.0                                       | 568 | SD002875           | -8.0                                       |
| 473 | SD002560           | -8.1                                       | 521 | SD001235           | -8.0                                       | 569 | SD003026           | -8.0                                       |
| 474 | SD002570           | -8.1                                       | 522 | SD001263           | -8.0                                       | 570 | SD000294           | -8.0                                       |
| 475 | SD000248           | -8.1                                       | 523 | SD000125           | -8.0                                       | 571 | SD003436           | -8.0                                       |
| 476 | SD003049           | -8.1                                       | 524 | SD001387           | -8.0                                       | 572 | SD003040           | -8.0                                       |
| 477 | SD002626           | -8.1                                       | 525 | SD001421           | -8.0                                       | 573 | SD003032           | -8.0                                       |
| 478 | SD002696           | -8.1                                       | 526 | SD001474           | -8.0                                       | 574 | SD003481           | -8.0                                       |
| 479 | SD002700           | -8.1                                       | 527 | SD001476           | -8.0                                       | 575 | SD003575           | -8.0                                       |

Table S1. Continued.

| No. | SuperDRUG2 Code | Standard Docking Score (kcal/mol) | No. | SuperDRUG2 Code | Standard Docking Score (kcal/mol) | No. | SuperDRUG2 Code | Standard Docking Score (kcal/mol) |
|-----|-----------------|-----------------------------------|-----|-----------------|-----------------------------------|-----|-----------------|-----------------------------------|
| 576 | SD003712        | -8.0                              | 624 | SD001899        | -7.9                              | 672 | SD003734        | -7.9                              |
| 577 | SD000362        | -8.0                              | 625 | SD001773        | -7.9                              | 673 | SD003754        | -7.9                              |
| 578 | SD003834        | -8.0                              | 626 | SD001936        | -7.9                              | 674 | SD003830        | -7.9                              |
| 579 | SD003866        | -8.0                              | 627 | SD001884        | -7.9                              | 675 | SD003833        | -7.9                              |
| 580 | SD006017        | -8.0                              | 628 | SD001775        | -7.9                              | 676 | SD003847        | -7.9                              |
| 581 | SD003947        | -8.0                              | 629 | SD001948        | -7.9                              | 677 | SD003879        | -7.9                              |
| 582 | SD006053        | -8.0                              | 630 | SD001994        | -7.9                              | 678 | SD000367        | -7.9                              |
| 583 | SD000385        | -8.0                              | 631 | SD002028        | -7.9                              | 679 | SD003924        | -7.9                              |
| 584 | SD000408        | -8.0                              | 632 | SD002004        | -7.9                              | 680 | SD003928        | -7.9                              |
| 585 | SD000423        | -8.0                              | 633 | SD003075        | -7.9                              | 681 | SD000034        | -7.9                              |
| 586 | SD000544        | -8.0                              | 634 | SD002109        | -7.9                              | 682 | SD000523        | -7.9                              |
| 587 | SD000646        | -8.0                              | 635 | SD002125        | -7.9                              | 683 | SD000591        | -7.9                              |
| 588 | SD000774        | -8.0                              | 636 | SD002128        | -7.9                              | 684 | SD000628        | -7.9                              |
| 589 | SD000701        | -8.0                              | 637 | SD002292        | -7.9                              | 685 | SD000618        | -7.9                              |
| 590 | SD000813        | -8.0                              | 638 | SD002283        | -7.9                              | 686 | SD000624        | -7.9                              |
| 591 | SD000789        | -8.0                              | 639 | SD002279        | -7.9                              | 687 | SD000647        | -7.9                              |
| 592 | SD000687        | -8.0                              | 640 | SD002383        | -7.9                              | 688 | SD000572        | -7.9                              |
| 593 | SD000884        | -7.9                              | 641 | SD002406        | -7.9                              | 689 | SD000844        | -7.9                              |
| 594 | SD000885        | -7.9                              | 642 | SD002369        | -7.9                              | 690 | SD000845        | -7.9                              |
| 595 | SD000913        | -7.9                              | 643 | SD002428        | -7.9                              | 691 | SD000785        | -7.9                              |
| 596 | SD000860        | -7.9                              | 644 | SD002371        | -7.9                              | 692 | SD000737        | -7.9                              |
| 597 | SD000004        | -7.9                              | 645 | SD002462        | -7.9                              | 693 | SD000815        | -7.9                              |
| 598 | SD000879        | -7.9                              | 646 | SD002477        | -7.9                              | 694 | SD000688        | -7.9                              |
| 599 | SD000977        | -7.9                              | 647 | SD000020        | -7.9                              | 695 | SD000894        | -7.8                              |
| 600 | SD000993        | -7.9                              | 648 | SD000256        | -7.9                              | 696 | SD000005        | -7.8                              |
| 601 | SD001061        | -7.9                              | 649 | SD000257        | -7.9                              | 697 | SD000975        | -7.8                              |
| 602 | SD003179        | -7.9                              | 650 | SD000260        | -7.9                              | 698 | SD001039        | -7.8                              |
| 603 | SD001077        | -7.9                              | 651 | SD003398        | -7.9                              | 699 | SD001041        | -7.8                              |
| 604 | SD001085        | -7.9                              | 652 | SD002723        | -7.9                              | 700 | SD001022        | -7.8                              |
| 605 | SD001079        | -7.9                              | 653 | SD002533        | -7.9                              | 701 | SD001093        | -7.8                              |
| 606 | SD001067        | -7.9                              | 654 | SD002817        | -7.9                              | 702 | SD001075        | -7.8                              |
| 607 | SD000926        | -7.9                              | 655 | SD002846        | -7.9                              | 703 | SD001047        | -7.8                              |
| 608 | SD001196        | -7.9                              | 656 | SD002786        | -7.9                              | 704 | SD001126        | -7.8                              |
| 609 | SD001353        | -7.9                              | 657 | SD000280        | -7.9                              | 705 | SD003171        | -7.8                              |
| 610 | SD001345        | -7.9                              | 658 | SD002872        | -7.9                              | 706 | SD001149        | -7.8                              |
| 611 | SD001413        | -7.9                              | 659 | SD003422        | -7.9                              | 707 | SD001244        | -7.8                              |
| 612 | SD001434        | -7.9                              | 660 | SD002948        | -7.9                              | 708 | SD001262        | -7.8                              |
| 613 | SD001422        | -7.9                              | 661 | SD003425        | -7.9                              | 709 | SD001322        | -7.8                              |
| 614 | SD001510        | -7.9                              | 662 | SD002537        | -7.9                              | 710 | SD003064        | -7.8                              |
| 615 | SD001568        | -7.9                              | 663 | SD003031        | -7.9                              | 711 | SD001381        | -7.8                              |
| 616 | SD001453        | -7.9                              | 664 | SD003449        | -7.9                              | 712 | SD001392        | -7.8                              |
| 617 | SD001655        | -7.9                              | 665 | SD003149        | -7.9                              | 713 | SD001411        | -7.8                              |
| 618 | SD001686        | -7.9                              | 666 | SD000025        | -7.9                              | 714 | SD001426        | -7.8                              |
| 619 | SD001690        | -7.9                              | 667 | SD003559        | -7.9                              | 715 | SD001446        | -7.8                              |
| 620 | SD001757        | -7.9                              | 668 | SD003582        | -7.9                              | 716 | SD001415        | -7.8                              |
| 621 | SD001110        | -7.9                              | 669 | SD003585        | -7.9                              | 717 | SD001424        | -7.8                              |
| 622 | SD000184        | -7.9                              | 670 | SD003654        | -7.9                              | 718 | SD001450        | -7.8                              |
| 623 | SD000189        | -7.9                              | 671 | SD003537        | -7.9                              | 719 | SD001469        | -7.8                              |

Table S1. Continued.

| No. | SuperDRUG2<br>Code | Standard<br>Docking<br>Score<br>(kcal/mol) | No. | SuperDRUG2<br>Code | Standard<br>Docking<br>Score<br>(kcal/mol) | No. | SuperDRUG2<br>Code | Standard<br>Docking<br>Score<br>(kcal/mol) |
|-----|--------------------|--------------------------------------------|-----|--------------------|--------------------------------------------|-----|--------------------|--------------------------------------------|
| 720 | SD001533           | -7.8                                       | 768 | SD002939           | -7.8                                       | 816 | SD001150           | -7.7                                       |
| 721 | SD001536           | -7.8                                       | 769 | SD002999           | -7.8                                       | 817 | SD001089           | -7.7                                       |
| 722 | SD001539           | -7.8                                       | 770 | SD003429           | -7.8                                       | 818 | SD001227           | -7.7                                       |
| 723 | SD001596           | -7.8                                       | 771 | SD002964           | -7.8                                       | 819 | SD001253           | -7.7                                       |
| 724 | SD001628           | -7.8                                       | 772 | SD003039           | -7.8                                       | 820 | SD001251           | -7.7                                       |
| 725 | SD001572           | -7.8                                       | 773 | SD003143           | -7.8                                       | 821 | SD001272           | -7.7                                       |
| 726 | SD001685           | -7.8                                       | 774 | SD003125           | -7.8                                       | 822 | SD000126           | -7.7                                       |
| 727 | SD001677           | -7.8                                       | 775 | SD000317           | -7.8                                       | 823 | SD003210           | -7.7                                       |
| 728 | SD001720           | -7.8                                       | 776 | SD003571           | -7.8                                       | 824 | SD001308           | -7.7                                       |
| 729 | SD001753           | -7.8                                       | 777 | SD000349           | -7.8                                       | 825 | SD001451           | -7.7                                       |
| 730 | SD001755           | -7.8                                       | 778 | SD003658           | -7.8                                       | 826 | SD001276           | -7.7                                       |
| 731 | SD001803           | -7.8                                       | 779 | SD003534           | -7.8                                       | 827 | SD003239           | -7.7                                       |
| 732 | SD001796           | -7.8                                       | 780 | SD003740           | -7.8                                       | 828 | SD000147           | -7.7                                       |
| 733 | SD001797           | -7.8                                       | 781 | SD003729           | -7.8                                       | 829 | SD001543           | -7.7                                       |
| 734 | SD001800           | -7.8                                       | 782 | SD003869           | -7.8                                       | 830 | SD001569           | -7.7                                       |
| 735 | SD001888           | -7.8                                       | 783 | SD003874           | -7.8                                       | 831 | SD001611           | -7.7                                       |
| 736 | SD001938           | -7.8                                       | 784 | SD003858           | -7.8                                       | 832 | SD001694           | -7.7                                       |
| 737 | SD001873           | -7.8                                       | 785 | SD003888           | -7.8                                       | 833 | SD001726           | -7.7                                       |
| 738 | SD003300           | -7.8                                       | 786 | SD003942           | -7.8                                       | 834 | SD000932           | -7.7                                       |
| 739 | SD002020           | -7.8                                       | 787 | SD003916           | -7.8                                       | 835 | SD003260           | -7.7                                       |
| 740 | SD003308           | -7.8                                       | 788 | SD006048           | -7.8                                       | 836 | SD001709           | -7.7                                       |
| 741 | SD002016           | -7.8                                       | 789 | SD000396           | -7.8                                       | 837 | SD000174           | -7.7                                       |
| 742 | SD000205           | -7.8                                       | 790 | SD000379           | -7.8                                       | 838 | SD001778           | -7.7                                       |
| 743 | SD002165           | -7.8                                       | 791 | SD000406           | -7.8                                       | 839 | SD003265           | -7.7                                       |
| 744 | SD001833           | -7.8                                       | 792 | SD000532           | -7.8                                       | 840 | SD000177           | -7.7                                       |
| 745 | SD001666           | -7.8                                       | 793 | SD000562           | -7.8                                       | 841 | SD001782           | -7.7                                       |
| 746 | SD002201           | -7.8                                       | 794 | SD000576           | -7.8                                       | 842 | SD003277           | -7.7                                       |
| 747 | SD000221           | -7.8                                       | 795 | SD000633           | -7.8                                       | 843 | SD001825           | -7.7                                       |
| 748 | SD002203           | -7.8                                       | 796 | SD000635           | -7.8                                       | 844 | SD001847           | -7.7                                       |
| 749 | SD002346           | -7.8                                       | 797 | SD000651           | -7.8                                       | 845 | SD003193           | -7.7                                       |
| 750 | SD002387           | -7.8                                       | 798 | SD000657           | -7.8                                       | 846 | SD001867           | -7.7                                       |
| 751 | SD002324           | -7.8                                       | 799 | SD000723           | -7.8                                       | 847 | SD001901           | -7.7                                       |
| 752 | SD002370           | -7.8                                       | 800 | SD000508           | -7.8                                       | 848 | SD001883           | -7.7                                       |
| 753 | SD002447           | -7.8                                       | 801 | SD000914           | -7.7                                       | 849 | SD001931           | -7.7                                       |
| 754 | SD002492           | -7.8                                       | 802 | SD000974           | -7.7                                       | 850 | SD003295           | -7.7                                       |
| 755 | SD002522           | -7.8                                       | 803 | SD000985           | -7.7                                       | 851 | SD001894           | -7.7                                       |
| 756 | SD003360           | -7.8                                       | 804 | SD003177           | -7.7                                       | 852 | SD001977           | -7.7                                       |
| 757 | SD002504           | -7.8                                       | 805 | SD001042           | -7.7                                       | 853 | SD002011           | -7.7                                       |
| 758 | SD002630           | -7.8                                       | 806 | SD001070           | -7.7                                       | 854 | SD002013           | -7.7                                       |
| 759 | SD000024           | -7.8                                       | 807 | SD001021           | -7.7                                       | 855 | SD001600           | -7.7                                       |
| 760 | SD002636           | -7.8                                       | 808 | SD001092           | -7.7                                       | 856 | SD003307           | -7.7                                       |
| 761 | SD002695           | -7.8                                       | 809 | SD001072           | -7.7                                       | 857 | SD000204           | -7.7                                       |
| 762 | SD003364           | -7.8                                       | 810 | SD000924           | -7.7                                       | 858 | SD000198           | -7.7                                       |
| 763 | SD002714           | -7.8                                       | 811 | SD000090           | -7.7                                       | 859 | SD002044           | -7.7                                       |
| 764 | SD003401           | -7.8                                       | 812 | SD001066           | -7.7                                       | 860 | SD002075           | -7.7                                       |
| 765 | SD002918           | -7.8                                       | 813 | SD001119           | -7.7                                       | 861 | SD002110           | -7.7                                       |
| 766 | SD002883           | -7.8                                       | 814 | SD001049           | -7.7                                       | 862 | SD002119           | -7.7                                       |
| 767 | SD000287           | -7.8                                       | 815 | SD001121           | -7.7                                       | 863 | SD002134           | -7.7                                       |

Table S1. Continued.

| No. | SuperDRUG2 Code | Standard Docking Score (kcal/mol) | No. | SuperDRUG2 Code | Standard Docking Score (kcal/mol) | No.  | SuperDRUG2 Code | Standard Docking Score (kcal/mol) |
|-----|-----------------|-----------------------------------|-----|-----------------|-----------------------------------|------|-----------------|-----------------------------------|
| 864 | SD002191        | -7.7                              | 912 | SD003781        | -7.7                              | 960  | SD001549        | -7.6                              |
| 865 | SD002136        | -7.7                              | 913 | SD003870        | -7.7                              | 961  | SD001483        | -7.6                              |
| 866 | SD002217        | -7.7                              | 914 | SD003863        | -7.7                              | 962  | SD001645        | -7.6                              |
| 867 | SD003340        | -7.7                              | 915 | SD003889        | -7.7                              | 963  | SD000161        | -7.6                              |
| 868 | SD002313        | -7.7                              | 916 | SD003917        | -7.7                              | 964  | SD001719        | -7.6                              |
| 869 | SD003358        | -7.7                              | 917 | SD003946        | -7.7                              | 965  | SD000171        | -7.6                              |
| 870 | SD002307        | -7.7                              | 918 | SD006022        | -7.7                              | 966  | SD001760        | -7.6                              |
| 871 | SD002411        | -7.7                              | 919 | SD000036        | -7.7                              | 967  | SD001112        | -7.6                              |
| 872 | SD002439        | -7.7                              | 920 | SD000390        | -7.7                              | 968  | SD000179        | -7.6                              |
| 873 | SD002457        | -7.7                              | 921 | SD000397        | -7.7                              | 969  | SD001750        | -7.6                              |
| 874 | SD002488        | -7.7                              | 922 | SD000402        | -7.7                              | 970  | SD000186        | -7.6                              |
| 875 | SD002486        | -7.7                              | 923 | SD000518        | -7.7                              | 971  | SD000182        | -7.6                              |
| 876 | SD002501        | -7.7                              | 924 | SD000599        | -7.7                              | 972  | SD001921        | -7.6                              |
| 877 | SD003378        | -7.7                              | 925 | SD000626        | -7.7                              | 973  | SD001767        | -7.6                              |
| 878 | SD002531        | -7.7                              | 926 | SD000629        | -7.7                              | 974  | SD001844        | -7.6                              |
| 879 | SD002562        | -7.7                              | 927 | SD000617        | -7.7                              | 975  | SD001957        | -7.6                              |
| 880 | SD003384        | -7.7                              | 928 | SD000480        | -7.7                              | 976  | SD001993        | -7.6                              |
| 881 | SD000262        | -7.7                              | 929 | SD000675        | -7.7                              | 977  | SD001981        | -7.6                              |
| 882 | SD002707        | -7.7                              | 930 | SD000706        | -7.7                              | 978  | SD002021        | -7.6                              |
| 883 | SD000266        | -7.7                              | 931 | SD000803        | -7.7                              | 979  | SD001988        | -7.6                              |
| 884 | SD002756        | -7.7                              | 932 | SD000820        | -7.7                              | 980  | SD002029        | -7.6                              |
| 885 | SD002758        | -7.7                              | 933 | SD000794        | -7.7                              | 981  | SD002012        | -7.6                              |
| 886 | SD002749        | -7.7                              | 934 | SD000791        | -7.7                              | 982  | SD001975        | -7.6                              |
| 887 | SD002763        | -7.7                              | 935 | SD000087        | -7.6                              | 983  | SD002080        | -7.6                              |
| 888 | SD002767        | -7.7                              | 936 | SD000893        | -7.6                              | 984  | SD002089        | -7.6                              |
| 889 | SD002772        | -7.7                              | 937 | SD000877        | -7.6                              | 985  | SD002141        | -7.6                              |
| 890 | SD002796        | -7.7                              | 938 | SD000083        | -7.6                              | 986  | SD001667        | -7.6                              |
| 891 | SD002755        | -7.7                              | 939 | SD000922        | -7.6                              | 987  | SD002253        | -7.6                              |
| 892 | SD002834        | -7.7                              | 940 | SD001006        | -7.6                              | 988  | SD002357        | -7.6                              |
| 893 | SD002829        | -7.7                              | 941 | SD001029        | -7.6                              | 989  | SD002341        | -7.6                              |
| 894 | SD002802        | -7.7                              | 942 | SD000102        | -7.6                              | 990  | SD002473        | -7.6                              |
| 895 | SD002866        | -7.7                              | 943 | SD001078        | -7.6                              | 991  | SD002505        | -7.6                              |
| 896 | SD003420        | -7.7                              | 944 | SD001108        | -7.6                              | 992  | SD002425        | -7.6                              |
| 897 | SD002959        | -7.7                              | 945 | SD000941        | -7.6                              | 993  | SD002547        | -7.6                              |
| 898 | SD003414        | -7.7                              | 946 | SD001205        | -7.6                              | 994  | SD002517        | -7.6                              |
| 899 | SD003041        | -7.7                              | 947 | SD001233        | -7.6                              | 995  | SD000245        | -7.6                              |
| 900 | SD003051        | -7.7                              | 948 | SD001217        | -7.6                              | 996  | SD002567        | -7.6                              |
| 901 | SD000314        | -7.7                              | 949 | SD001234        | -7.6                              | 997  | SD002530        | -7.6                              |
| 902 | SD000316        | -7.7                              | 950 | SD001219        | -7.6                              | 998  | SD000254        | -7.6                              |
| 903 | SD000319        | -7.7                              | 951 | SD001328        | -7.6                              | 999  | SD000021        | -7.6                              |
| 904 | SD000331        | -7.7                              | 952 | SD003067        | -7.6                              | 1000 | SD002638        | -7.6                              |
| 905 | SD000343        | -7.7                              | 953 | SD001350        | -7.6                              | 1001 | SD000264        | -7.6                              |
| 906 | SD003601        | -7.7                              | 954 | SD001418        | -7.6                              | 1002 | SD002721        | -7.6                              |
| 907 | SD003630        | -7.7                              | 955 | SD001432        | -7.6                              | 1003 | SD002705        | -7.6                              |
| 908 | SD003665        | -7.7                              | 956 | SD000144        | -7.6                              | 1004 | SD002757        | -7.6                              |
| 909 | SD003647        | -7.7                              | 957 | SD001360        | -7.6                              | 1005 | SD002741        | -7.6                              |
| 910 | SD003726        | -7.7                              | 958 | SD001506        | -7.6                              | 1006 | SD002742        | -7.6                              |
| 911 | SD003731        | -7.7                              | 959 | SD001525        | -7.6                              | 1007 | SD003402        | -7.6                              |

Table S1. Continued.

| No.  | SuperDRUG2 Code | Standard Docking Score (kcal/mol) | No.  | SuperDRUG2 Code | Standard Docking Score (kcal/mol) | No.  | SuperDRUG2 Code | Standard Docking Score (kcal/mol) |
|------|-----------------|-----------------------------------|------|-----------------|-----------------------------------|------|-----------------|-----------------------------------|
| 1008 | SD002805        | -7.6                              | 1056 | SD000670        | -7.6                              | 1104 | SD003299        | -7.5                              |
| 1009 | SD002898        | -7.6                              | 1057 | SD000817        | -7.6                              | 1105 | SD001966        | -7.5                              |
| 1010 | SD002878        | -7.6                              | 1058 | SD000809        | -7.6                              | 1106 | SD002043        | -7.5                              |
| 1011 | SD002865        | -7.6                              | 1059 | SD000722        | -7.6                              | 1107 | SD000197        | -7.5                              |
| 1012 | SD002884        | -7.6                              | 1060 | SD000889        | -7.5                              | 1108 | SD002001        | -7.5                              |
| 1013 | SD002991        | -7.6                              | 1061 | SD000909        | -7.5                              | 1109 | SD001997        | -7.5                              |
| 1014 | SD002994        | -7.6                              | 1062 | SD000872        | -7.5                              | 1110 | SD003324        | -7.5                              |
| 1015 | SD002962        | -7.6                              | 1063 | SD000976        | -7.5                              | 1111 | SD002196        | -7.5                              |
| 1016 | SD003004        | -7.6                              | 1064 | SD001030        | -7.5                              | 1112 | SD002276        | -7.5                              |
| 1017 | SD003029        | -7.6                              | 1065 | SD000100        | -7.5                              | 1113 | SD002295        | -7.5                              |
| 1018 | SD003104        | -7.6                              | 1066 | SD003182        | -7.5                              | 1114 | SD002232        | -7.5                              |
| 1019 | SD003134        | -7.6                              | 1067 | SD001076        | -7.5                              | 1115 | SD002352        | -7.5                              |
| 1020 | SD000311        | -7.6                              | 1068 | SD001026        | -7.5                              | 1116 | SD002348        | -7.5                              |
| 1021 | SD000321        | -7.6                              | 1069 | SD000104        | -7.5                              | 1117 | SD000231        | -7.5                              |
| 1022 | SD003495        | -7.6                              | 1070 | SD003178        | -7.5                              | 1118 | SD002456        | -7.5                              |
| 1023 | SD003510        | -7.6                              | 1071 | SD001050        | -7.5                              | 1119 | SD002223        | -7.5                              |
| 1024 | SD003540        | -7.6                              | 1072 | SD001125        | -7.5                              | 1120 | SD002472        | -7.5                              |
| 1025 | SD003603        | -7.6                              | 1073 | SD001208        | -7.5                              | 1121 | SD002475        | -7.5                              |
| 1026 | SD003577        | -7.6                              | 1074 | SD001226        | -7.5                              | 1122 | SD002424        | -7.5                              |
| 1027 | SD003704        | -7.6                              | 1075 | SD001198        | -7.5                              | 1123 | SD003366        | -7.5                              |
| 1028 | SD003705        | -7.6                              | 1076 | SD001339        | -7.5                              | 1124 | SD000243        | -7.5                              |
| 1029 | SD003724        | -7.6                              | 1077 | SD001266        | -7.5                              | 1125 | SD002502        | -7.5                              |
| 1030 | SD003718        | -7.6                              | 1078 | SD001370        | -7.5                              | 1126 | SD002541        | -7.5                              |
| 1031 | SD003744        | -7.6                              | 1079 | SD001281        | -7.5                              | 1127 | SD002684        | -7.5                              |
| 1032 | SD003745        | -7.6                              | 1080 | SD001282        | -7.5                              | 1128 | SD002783        | -7.5                              |
| 1033 | SD003739        | -7.6                              | 1081 | SD001414        | -7.5                              | 1129 | SD002753        | -7.5                              |
| 1034 | SD003795        | -7.6                              | 1082 | SD001464        | -7.5                              | 1130 | SD002554        | -7.5                              |
| 1035 | SD003821        | -7.6                              | 1083 | SD003225        | -7.5                              | 1131 | SD002798        | -7.5                              |
| 1036 | SD003850        | -7.6                              | 1084 | SD001503        | -7.5                              | 1132 | SD000275        | -7.5                              |
| 1037 | SD003829        | -7.6                              | 1085 | SD000153        | -7.5                              | 1133 | SD002780        | -7.5                              |
| 1038 | SD003899        | -7.6                              | 1086 | SD001570        | -7.5                              | 1134 | SD002858        | -7.5                              |
| 1039 | SD003865        | -7.6                              | 1087 | SD001595        | -7.5                              | 1135 | SD002860        | -7.5                              |
| 1040 | SD003949        | -7.6                              | 1088 | SD001679        | -7.5                              | 1136 | SD003409        | -7.5                              |
| 1041 | SD003904        | -7.6                              | 1089 | SD001702        | -7.5                              | 1137 | SD002903        | -7.5                              |
| 1042 | SD006004        | -7.6                              | 1090 | SD001181        | -7.5                              | 1138 | SD002956        | -7.5                              |
| 1043 | SD006030        | -7.6                              | 1091 | SD001615        | -7.5                              | 1139 | SD002960        | -7.5                              |
| 1044 | SD006032        | -7.6                              | 1092 | SD001805        | -7.5                              | 1140 | SD000289        | -7.5                              |
| 1045 | SD006015        | -7.6                              | 1093 | SD001781        | -7.5                              | 1141 | SD002990        | -7.5                              |
| 1046 | SD000436        | -7.6                              | 1094 | SD001813        | -7.5                              | 1142 | SD003440        | -7.5                              |
| 1047 | SD000550        | -7.6                              | 1095 | SD001848        | -7.5                              | 1143 | SD003142        | -7.5                              |
| 1048 | SD000551        | -7.6                              | 1096 | SD001868        | -7.5                              | 1144 | SD003472        | -7.5                              |
| 1049 | SD000555        | -7.6                              | 1097 | SD001905        | -7.5                              | 1145 | SD000327        | -7.5                              |
| 1050 | SD000563        | -7.6                              | 1098 | SD001923        | -7.5                              | 1146 | SD003572        | -7.5                              |
| 1051 | SD000580        | -7.6                              | 1099 | SD001956        | -7.5                              | 1147 | SD003602        | -7.5                              |
| 1052 | SD000521        | -7.6                              | 1100 | SD003282        | -7.5                              | 1148 | SD003632        | -7.5                              |
| 1053 | SD000620        | -7.6                              | 1101 | SD001777        | -7.5                              | 1149 | SD003514        | -7.5                              |
| 1054 | SD000642        | -7.6                              | 1102 | SD001962        | -7.5                              | 1150 | SD003698        | -7.5                              |
| 1055 | SD000615        | -7.6                              | 1103 | SD001978        | -7.5                              | 1151 | SD003687        | -7.5                              |

Table S1. Continued.

| No.  | SuperDRUG2 Code | Standard Docking Score (kcal/mol) | No.  | SuperDRUG2 Code | Standard Docking Score (kcal/mol) | No.  | SuperDRUG2 Code | Standard Docking Score (kcal/mol) |
|------|-----------------|-----------------------------------|------|-----------------|-----------------------------------|------|-----------------|-----------------------------------|
| 1152 | SD003823        | -7.5                              | 1200 | SD000169        | -7.4                              | 1248 | SD003380        | -7.4                              |
| 1153 | SD003826        | -7.5                              | 1201 | SD001738        | -7.4                              | 1249 | SD000267        | -7.4                              |
| 1154 | SD003875        | -7.5                              | 1202 | SD001779        | -7.4                              | 1250 | SD002777        | -7.4                              |
| 1155 | SD003766        | -7.5                              | 1203 | SD000165        | -7.4                              | 1251 | SD003411        | -7.4                              |
| 1156 | SD003890        | -7.5                              | 1204 | SD001823        | -7.4                              | 1252 | SD000276        | -7.4                              |
| 1157 | SD003907        | -7.5                              | 1205 | SD001817        | -7.4                              | 1253 | SD002801        | -7.4                              |
| 1158 | SD000446        | -7.5                              | 1206 | SD001841        | -7.4                              | 1254 | SD002887        | -7.4                              |
| 1159 | SD000589        | -7.5                              | 1207 | SD001891        | -7.4                              | 1255 | SD000281        | -7.4                              |
| 1160 | SD000594        | -7.5                              | 1208 | SD001929        | -7.4                              | 1256 | SD002864        | -7.4                              |
| 1161 | SD000704        | -7.5                              | 1209 | SD001918        | -7.4                              | 1257 | SD000284        | -7.4                              |
| 1162 | SD000713        | -7.5                              | 1210 | SD001843        | -7.4                              | 1258 | SD002974        | -7.4                              |
| 1163 | SD000714        | -7.5                              | 1211 | SD002035        | -7.4                              | 1259 | SD002993        | -7.4                              |
| 1164 | SD000753        | -7.5                              | 1212 | SD000193        | -7.4                              | 1260 | SD003007        | -7.4                              |
| 1165 | SD000658        | -7.5                              | 1213 | SD002057        | -7.4                              | 1261 | SD003091        | -7.4                              |
| 1166 | SD000755        | -7.5                              | 1214 | SD002063        | -7.4                              | 1262 | SD003129        | -7.4                              |
| 1167 | SD000717        | -7.5                              | 1215 | SD003317        | -7.4                              | 1263 | SD003057        | -7.4                              |
| 1168 | SD000804        | -7.5                              | 1216 | SD002130        | -7.4                              | 1264 | SD003119        | -7.4                              |
| 1169 | SD000509        | -7.5                              | 1217 | SD002151        | -7.4                              | 1265 | SD003121        | -7.4                              |
| 1170 | SD000919        | -7.4                              | 1218 | SD002118        | -7.4                              | 1266 | SD003486        | -7.4                              |
| 1171 | SD000859        | -7.4                              | 1219 | SD002167        | -7.4                              | 1267 | SD003482        | -7.4                              |
| 1172 | SD000849        | -7.4                              | 1220 | SD002168        | -7.4                              | 1268 | SD000334        | -7.4                              |
| 1173 | SD000905        | -7.4                              | 1221 | SD002202        | -7.4                              | 1269 | SD003530        | -7.4                              |
| 1174 | SD000862        | -7.4                              | 1222 | SD002312        | -7.4                              | 1270 | SD000345        | -7.4                              |
| 1175 | SD000961        | -7.4                              | 1223 | SD002206        | -7.4                              | 1271 | SD003595        | -7.4                              |
| 1176 | SD001031        | -7.4                              | 1224 | SD002336        | -7.4                              | 1272 | SD003695        | -7.4                              |
| 1177 | SD001032        | -7.4                              | 1225 | SD002354        | -7.4                              | 1273 | SD003809        | -7.4                              |
| 1178 | SD001016        | -7.4                              | 1226 | SD002304        | -7.4                              | 1274 | SD003827        | -7.4                              |
| 1179 | SD001059        | -7.4                              | 1227 | SD002338        | -7.4                              | 1275 | SD003885        | -7.4                              |
| 1180 | SD000940        | -7.4                              | 1228 | SD002318        | -7.4                              | 1276 | SD006016        | -7.4                              |
| 1181 | SD001225        | -7.4                              | 1229 | SD002404        | -7.4                              | 1277 | SD003927        | -7.4                              |
| 1182 | SD001187        | -7.4                              | 1230 | SD002325        | -7.4                              | 1278 | SD006005        | -7.4                              |
| 1183 | SD001222        | -7.4                              | 1231 | SD000237        | -7.4                              | 1279 | SD000054        | -7.4                              |
| 1184 | SD001320        | -7.4                              | 1232 | SD002458        | -7.4                              | 1280 | SD000058        | -7.4                              |
| 1185 | SD001352        | -7.4                              | 1233 | SD002434        | -7.4                              | 1281 | SD000070        | -7.4                              |
| 1186 | SD001399        | -7.4                              | 1234 | SD002490        | -7.4                              | 1282 | SD000072        | -7.4                              |
| 1187 | SD001425        | -7.4                              | 1235 | SD002443        | -7.4                              | 1283 | SD000049        | -7.4                              |
| 1188 | SD001429        | -7.4                              | 1236 | SD002381        | -7.4                              | 1284 | SD000066        | -7.4                              |
| 1189 | SD001431        | -7.4                              | 1237 | SD002487        | -7.4                              | 1285 | SD000400        | -7.4                              |
| 1190 | SD003229        | -7.4                              | 1238 | SD003367        | -7.4                              | 1286 | SD000444        | -7.4                              |
| 1191 | SD001531        | -7.4                              | 1239 | SD002591        | -7.4                              | 1287 | SD000477        | -7.4                              |
| 1192 | SD001518        | -7.4                              | 1240 | SD000251        | -7.4                              | 1288 | SD000590        | -7.4                              |
| 1193 | SD001508        | -7.4                              | 1241 | SD002454        | -7.4                              | 1289 | SD000603        | -7.4                              |
| 1194 | SD001583        | -7.4                              | 1242 | SD000255        | -7.4                              | 1290 | SD000712        | -7.4                              |
| 1195 | SD001597        | -7.4                              | 1243 | SD002631        | -7.4                              | 1291 | SD000672        | -7.4                              |
| 1196 | SD001660        | -7.4                              | 1244 | SD002585        | -7.4                              | 1292 | SD000472        | -7.4                              |
| 1197 | SD001699        | -7.4                              | 1245 | SD003390        | -7.4                              | 1293 | SD000752        | -7.4                              |
| 1198 | SD001659        | -7.4                              | 1246 | SD002419        | -7.4                              | 1294 | SD000741        | -7.4                              |
| 1199 | SD001710        | -7.4                              | 1247 | SD002694        | -7.4                              | 1295 | SD000802        | -7.4                              |

Table S1. Continued.

| No.  | SuperDRUG2<br>Code | Standard<br>Docking<br>Score<br>(kcal/mol) | No.  | SuperDRUG2<br>Code | Standard<br>Docking<br>Score<br>(kcal/mol) | No.  | SuperDRUG2<br>Code | Standard<br>Docking<br>Score<br>(kcal/mol) |
|------|--------------------|--------------------------------------------|------|--------------------|--------------------------------------------|------|--------------------|--------------------------------------------|
| 1296 | SD000826           | -7.4                                       | 1344 | SD002103           | -7.3                                       | 1392 | SD003597           | -7.3                                       |
| 1297 | SD000797           | -7.4                                       | 1345 | SD002166           | -7.3                                       | 1393 | SD003621           | -7.3                                       |
| 1298 | SD000954           | -7.3                                       | 1346 | SD002146           | -7.3                                       | 1394 | SD003648           | -7.3                                       |
| 1299 | SD003059           | -7.3                                       | 1347 | SD002152           | -7.3                                       | 1395 | SD003568           | -7.3                                       |
| 1300 | SD000098           | -7.3                                       | 1348 | SD002242           | -7.3                                       | 1396 | SD003725           | -7.3                                       |
| 1301 | SD000997           | -7.3                                       | 1349 | SD002272           | -7.3                                       | 1397 | SD003690           | -7.3                                       |
| 1302 | SD000923           | -7.3                                       | 1350 | SD002197           | -7.3                                       | 1398 | SD003815           | -7.3                                       |
| 1303 | SD001018           | -7.3                                       | 1351 | SD002249           | -7.3                                       | 1399 | SD000373           | -7.3                                       |
| 1304 | SD001064           | -7.3                                       | 1352 | SD002286           | -7.3                                       | 1400 | SD006020           | -7.3                                       |
| 1305 | SD001055           | -7.3                                       | 1353 | SD000216           | -7.3                                       | 1401 | SD000044           | -7.3                                       |
| 1306 | SD001024           | -7.3                                       | 1354 | SD002363           | -7.3                                       | 1402 | SD000073           | -7.3                                       |
| 1307 | SD000950           | -7.3                                       | 1355 | SD002342           | -7.3                                       | 1403 | SD003936           | -7.3                                       |
| 1308 | SD001082           | -7.3                                       | 1356 | SD002365           | -7.3                                       | 1404 | SD000417           | -7.3                                       |
| 1309 | SD001083           | -7.3                                       | 1357 | SD002420           | -7.3                                       | 1405 | SD000437           | -7.3                                       |
| 1310 | SD001087           | -7.3                                       | 1358 | SD002429           | -7.3                                       | 1406 | SD000452           | -7.3                                       |
| 1311 | SD000111           | -7.3                                       | 1359 | SD002464           | -7.3                                       | 1407 | SD000476           | -7.3                                       |
| 1312 | SD001194           | -7.3                                       | 1360 | SD003079           | -7.3                                       | 1408 | SD000573           | -7.3                                       |
| 1313 | SD001105           | -7.3                                       | 1361 | SD002483           | -7.3                                       | 1409 | SD000720           | -7.3                                       |
| 1314 | SD003202           | -7.3                                       | 1362 | SD002565           | -7.3                                       | 1410 | SD000744           | -7.3                                       |
| 1315 | SD001218           | -7.3                                       | 1363 | SD002566           | -7.3                                       | 1411 | SD000747           | -7.3                                       |
| 1316 | SD003206           | -7.3                                       | 1364 | SD002574           | -7.3                                       | 1412 | SD000805           | -7.3                                       |
| 1317 | SD001214           | -7.3                                       | 1365 | SD002640           | -7.3                                       | 1413 | SD000847           | -7.3                                       |
| 1318 | SD003205           | -7.3                                       | 1366 | SD002643           | -7.3                                       | 1414 | SD000829           | -7.3                                       |
| 1319 | SD001391           | -7.3                                       | 1367 | SD000259           | -7.3                                       | 1415 | SD000811           | -7.3                                       |
| 1320 | SD001270           | -7.3                                       | 1368 | SD002682           | -7.3                                       | 1416 | SD000901           | -7.2                                       |
| 1321 | SD001372           | -7.3                                       | 1369 | SD002687           | -7.3                                       | 1417 | SD000921           | -7.2                                       |
| 1322 | SD001402           | -7.3                                       | 1370 | SD002628           | -7.3                                       | 1418 | SD000986           | -7.2                                       |
| 1323 | SD001472           | -7.3                                       | 1371 | SD002670           | -7.3                                       | 1419 | SD000987           | -7.2                                       |
| 1324 | SD001576           | -7.3                                       | 1372 | SD002808           | -7.3                                       | 1420 | SD001005           | -7.2                                       |
| 1325 | SD001619           | -7.3                                       | 1373 | SD003406           | -7.3                                       | 1421 | SD000095           | -7.2                                       |
| 1326 | SD001629           | -7.3                                       | 1374 | SD002934           | -7.3                                       | 1422 | SD000992           | -7.2                                       |
| 1327 | SD001647           | -7.3                                       | 1375 | SD002938           | -7.3                                       | 1423 | SD001040           | -7.2                                       |
| 1328 | SD001649           | -7.3                                       | 1376 | SD000288           | -7.3                                       | 1424 | SD001053           | -7.2                                       |
| 1329 | SD001703           | -7.3                                       | 1377 | SD002941           | -7.3                                       | 1425 | SD001065           | -7.2                                       |
| 1330 | SD001708           | -7.3                                       | 1378 | SD002949           | -7.3                                       | 1426 | SD001135           | -7.2                                       |
| 1331 | SD003259           | -7.3                                       | 1379 | SD003042           | -7.3                                       | 1427 | SD001088           | -7.2                                       |
| 1332 | SD000173           | -7.3                                       | 1380 | SD003133           | -7.3                                       | 1428 | SD000951           | -7.2                                       |
| 1333 | SD001739           | -7.3                                       | 1381 | SD000295           | -7.3                                       | 1429 | SD003194           | -7.2                                       |
| 1334 | SD003072           | -7.3                                       | 1382 | SD003379           | -7.3                                       | 1430 | SD001099           | -7.2                                       |
| 1335 | SD001788           | -7.3                                       | 1383 | SD003148           | -7.3                                       | 1431 | SD001183           | -7.2                                       |
| 1336 | SD001789           | -7.3                                       | 1384 | SD000305           | -7.3                                       | 1432 | SD001176           | -7.2                                       |
| 1337 | SD001862           | -7.3                                       | 1385 | SD003126           | -7.3                                       | 1433 | SD000124           | -7.2                                       |
| 1338 | SD001922           | -7.3                                       | 1386 | SD003479           | -7.3                                       | 1434 | SD001337           | -7.2                                       |
| 1339 | SD001925           | -7.3                                       | 1387 | SD003483           | -7.3                                       | 1435 | SD001371           | -7.2                                       |
| 1340 | SD002040           | -7.3                                       | 1388 | SD000322           | -7.3                                       | 1436 | SD001307           | -7.2                                       |
| 1341 | SD003272           | -7.3                                       | 1389 | SD000027           | -7.3                                       | 1437 | SD001437           | -7.2                                       |
| 1342 | SD003196           | -7.3                                       | 1390 | SD003592           | -7.3                                       | 1438 | SD001364           | -7.2                                       |
| 1343 | SD002008           | -7.3                                       | 1391 | SD003611           | -7.3                                       | 1439 | SD001277           | -7.2                                       |

Table S1. Continued.

| No.  | SuperDRUG2<br>Code | Standard<br>Docking<br>Score<br>(kcal/mol) | No.  | SuperDRUG2<br>Code | Standard<br>Docking<br>Score<br>(kcal/mol) | No.  | SuperDRUG2<br>Code | Standard<br>Docking<br>Score<br>(kcal/mol) |
|------|--------------------|--------------------------------------------|------|--------------------|--------------------------------------------|------|--------------------|--------------------------------------------|
| 1440 | SD001523           | -7.2                                       | 1488 | SD002920           | -7.2                                       | 1536 | SD000972           | -7.1                                       |
| 1441 | SD003238           | -7.2                                       | 1489 | SD002823           | -7.2                                       | 1537 | SD000864           | -7.1                                       |
| 1442 | SD001493           | -7.2                                       | 1490 | SD002971           | -7.2                                       | 1538 | SD001011           | -7.1                                       |
| 1443 | SD000155           | -7.2                                       | 1491 | SD002984           | -7.2                                       | 1539 | SD000984           | -7.1                                       |
| 1444 | SD001632           | -7.2                                       | 1492 | SD000293           | -7.2                                       | 1540 | SD000086           | -7.1                                       |
| 1445 | SD003245           | -7.2                                       | 1493 | SD003038           | -7.2                                       | 1541 | SD001037           | -7.1                                       |
| 1446 | SD001654           | -7.2                                       | 1494 | SD003046           | -7.2                                       | 1542 | SD000099           | -7.1                                       |
| 1447 | SD001669           | -7.2                                       | 1495 | SD000323           | -7.2                                       | 1543 | SD003176           | -7.1                                       |
| 1448 | SD001656           | -7.2                                       | 1496 | SD000030           | -7.2                                       | 1544 | SD001081           | -7.1                                       |
| 1449 | SD003256           | -7.2                                       | 1497 | SD003502           | -7.2                                       | 1545 | SD001123           | -7.1                                       |
| 1450 | SD001707           | -7.2                                       | 1498 | SD003562           | -7.2                                       | 1546 | SD003190           | -7.1                                       |
| 1451 | SD000164           | -7.2                                       | 1499 | SD003513           | -7.2                                       | 1547 | SD001171           | -7.1                                       |
| 1452 | SD001731           | -7.2                                       | 1500 | SD003583           | -7.2                                       | 1548 | SD001199           | -7.1                                       |
| 1453 | SD001748           | -7.2                                       | 1501 | SD000346           | -7.2                                       | 1549 | SD001188           | -7.1                                       |
| 1454 | SD001882           | -7.2                                       | 1502 | SD003590           | -7.2                                       | 1550 | SD001252           | -7.1                                       |
| 1455 | SD003074           | -7.2                                       | 1503 | SD003619           | -7.2                                       | 1551 | SD001250           | -7.1                                       |
| 1456 | SD001944           | -7.2                                       | 1504 | SD003676           | -7.2                                       | 1552 | SD001211           | -7.1                                       |
| 1457 | SD001952           | -7.2                                       | 1505 | SD003681           | -7.2                                       | 1553 | SD001362           | -7.1                                       |
| 1458 | SD003290           | -7.2                                       | 1506 | SD003732           | -7.2                                       | 1554 | SD001265           | -7.1                                       |
| 1459 | SD002081           | -7.2                                       | 1507 | SD003708           | -7.2                                       | 1555 | SD001348           | -7.1                                       |
| 1460 | SD002099           | -7.2                                       | 1508 | SD003535           | -7.2                                       | 1556 | SD001306           | -7.1                                       |
| 1461 | SD002124           | -7.2                                       | 1509 | SD003867           | -7.2                                       | 1557 | SD001309           | -7.1                                       |
| 1462 | SD002177           | -7.2                                       | 1510 | SD003838           | -7.2                                       | 1558 | SD001430           | -7.1                                       |
| 1463 | SD002113           | -7.2                                       | 1511 | SD003673           | -7.2                                       | 1559 | SD001435           | -7.1                                       |
| 1464 | SD002140           | -7.2                                       | 1512 | SD003768           | -7.2                                       | 1560 | SD001462           | -7.1                                       |
| 1465 | SD003304           | -7.2                                       | 1513 | SD006008           | -7.2                                       | 1561 | SD001443           | -7.1                                       |
| 1466 | SD002180           | -7.2                                       | 1514 | SD003909           | -7.2                                       | 1562 | SD001492           | -7.1                                       |
| 1467 | SD002154           | -7.2                                       | 1515 | SD000050           | -7.2                                       | 1563 | SD001557           | -7.1                                       |
| 1468 | SD002259           | -7.2                                       | 1516 | SD000061           | -7.2                                       | 1564 | SD001480           | -7.1                                       |
| 1469 | SD002335           | -7.2                                       | 1517 | SD000399           | -7.2                                       | 1565 | SD000152           | -7.1                                       |
| 1470 | SD002291           | -7.2                                       | 1518 | SD000405           | -7.2                                       | 1566 | SD001542           | -7.1                                       |
| 1471 | SD002407           | -7.2                                       | 1519 | SD000421           | -7.2                                       | 1567 | SD001639           | -7.1                                       |
| 1472 | SD002161           | -7.2                                       | 1520 | SD000549           | -7.2                                       | 1568 | SD001633           | -7.1                                       |
| 1473 | SD002433           | -7.2                                       | 1521 | SD000487           | -7.2                                       | 1569 | SD001695           | -7.1                                       |
| 1474 | SD002413           | -7.2                                       | 1522 | SD000595           | -7.2                                       | 1570 | SD001180           | -7.1                                       |
| 1475 | SD002538           | -7.2                                       | 1523 | SD000602           | -7.2                                       | 1571 | SD001722           | -7.1                                       |
| 1476 | SD000252           | -7.2                                       | 1524 | SD000636           | -7.2                                       | 1572 | SD001723           | -7.1                                       |
| 1477 | SD000258           | -7.2                                       | 1525 | SD000640           | -7.2                                       | 1573 | SD001681           | -7.1                                       |
| 1478 | SD002583           | -7.2                                       | 1526 | SD000762           | -7.2                                       | 1574 | SD000013           | -7.1                                       |
| 1479 | SD002693           | -7.2                                       | 1527 | SD000763           | -7.2                                       | 1575 | SD001749           | -7.1                                       |
| 1480 | SD002587           | -7.2                                       | 1528 | SD000768           | -7.2                                       | 1576 | SD001857           | -7.1                                       |
| 1481 | SD002724           | -7.2                                       | 1529 | SD000801           | -7.2                                       | 1577 | SD001765           | -7.1                                       |
| 1482 | SD002735           | -7.2                                       | 1530 | SD000837           | -7.2                                       | 1578 | SD001906           | -7.1                                       |
| 1483 | SD000268           | -7.2                                       | 1531 | SD000818           | -7.2                                       | 1579 | SD001916           | -7.1                                       |
| 1484 | SD002750           | -7.2                                       | 1532 | SD000842           | -7.2                                       | 1580 | SD001895           | -7.1                                       |
| 1485 | SD003408           | -7.2                                       | 1533 | SD000507           | -7.2                                       | 1581 | SD003297           | -7.1                                       |
| 1486 | SD002811           | -7.2                                       | 1534 | SD000002           | -7.1                                       | 1582 | SD003288           | -7.1                                       |
| 1487 | SD002788           | -7.2                                       | 1535 | SD000904           | -7.1                                       | 1583 | SD001986           | -7.1                                       |

Table S1. Continued.

| No.  | SuperDRUG2<br>Code | Standard<br>Docking<br>Score<br>(kcal/mol) | No.  | SuperDRUG2<br>Code | Standard<br>Docking<br>Score<br>(kcal/mol) | No.  | SuperDRUG2<br>Code | Standard<br>Docking<br>Score<br>(kcal/mol) |
|------|--------------------|--------------------------------------------|------|--------------------|--------------------------------------------|------|--------------------|--------------------------------------------|
| 1584 | SD003298           | -7.1                                       | 1632 | SD003773           | -7.1                                       | 1680 | SD001718           | -7.0                                       |
| 1585 | SD001984           | -7.1                                       | 1633 | SD003849           | -7.1                                       | 1681 | SD001730           | -7.0                                       |
| 1586 | SD002030           | -7.1                                       | 1634 | SD000376           | -7.1                                       | 1682 | SD001734           | -7.0                                       |
| 1587 | SD002042           | -7.1                                       | 1635 | SD003846           | -7.1                                       | 1683 | SD001809           | -7.0                                       |
| 1588 | SD001970           | -7.1                                       | 1636 | SD000067           | -7.1                                       | 1684 | SD002052           | -7.0                                       |
| 1589 | SD002156           | -7.1                                       | 1637 | SD000074           | -7.1                                       | 1685 | SD002055           | -7.0                                       |
| 1590 | SD000212           | -7.1                                       | 1638 | SD000392           | -7.1                                       | 1686 | SD002073           | -7.0                                       |
| 1591 | SD002226           | -7.1                                       | 1639 | SD000415           | -7.1                                       | 1687 | SD002095           | -7.0                                       |
| 1592 | SD002228           | -7.1                                       | 1640 | SD000552           | -7.1                                       | 1688 | SD002062           | -7.0                                       |
| 1593 | SD000219           | -7.1                                       | 1641 | SD000579           | -7.1                                       | 1689 | SD002096           | -7.0                                       |
| 1594 | SD002266           | -7.1                                       | 1642 | SD000637           | -7.1                                       | 1690 | SD002091           | -7.0                                       |
| 1595 | SD002245           | -7.1                                       | 1643 | SD000665           | -7.1                                       | 1691 | SD003314           | -7.0                                       |
| 1596 | SD002261           | -7.1                                       | 1644 | SD000571           | -7.1                                       | 1692 | SD002111           | -7.0                                       |
| 1597 | SD002246           | -7.1                                       | 1645 | SD000695           | -7.1                                       | 1693 | SD002181           | -7.0                                       |
| 1598 | SD002275           | -7.1                                       | 1646 | SD000656           | -7.1                                       | 1694 | SD000217           | -7.0                                       |
| 1599 | SD000228           | -7.1                                       | 1647 | SD000800           | -7.1                                       | 1695 | SD002268           | -7.0                                       |
| 1600 | SD002309           | -7.1                                       | 1648 | SD000771           | -7.1                                       | 1696 | SD002237           | -7.0                                       |
| 1601 | SD002224           | -7.1                                       | 1649 | SD000810           | -7.1                                       | 1697 | SD002284           | -7.0                                       |
| 1602 | SD002430           | -7.1                                       | 1650 | SD000886           | -7.0                                       | 1698 | SD002385           | -7.0                                       |
| 1603 | SD003359           | -7.1                                       | 1651 | SD000912           | -7.0                                       | 1699 | SD002347           | -7.0                                       |
| 1604 | SD002466           | -7.1                                       | 1652 | SD000903           | -7.0                                       | 1700 | SD003356           | -7.0                                       |
| 1605 | SD002445           | -7.1                                       | 1653 | SD000850           | -7.0                                       | 1701 | SD002455           | -7.0                                       |
| 1606 | SD002579           | -7.1                                       | 1654 | SD000888           | -7.0                                       | 1702 | SD002412           | -7.0                                       |
| 1607 | SD002452           | -7.1                                       | 1655 | SD003167           | -7.0                                       | 1703 | SD002427           | -7.0                                       |
| 1608 | SD002569           | -7.1                                       | 1656 | SD000907           | -7.0                                       | 1704 | SD002556           | -7.0                                       |
| 1609 | SD002540           | -7.1                                       | 1657 | SD000953           | -7.0                                       | 1705 | SD002539           | -7.0                                       |
| 1610 | SD003383           | -7.1                                       | 1658 | SD003161           | -7.0                                       | 1706 | SD002568           | -7.0                                       |
| 1611 | SD002551           | -7.1                                       | 1659 | SD000955           | -7.0                                       | 1707 | SD002521           | -7.0                                       |
| 1612 | SD002747           | -7.1                                       | 1660 | SD001101           | -7.0                                       | 1708 | SD002577           | -7.0                                       |
| 1613 | SD002748           | -7.1                                       | 1661 | SD001091           | -7.0                                       | 1709 | SD002507           | -7.0                                       |
| 1614 | SD000271           | -7.1                                       | 1662 | SD001191           | -7.0                                       | 1710 | SD002580           | -7.0                                       |
| 1615 | SD002809           | -7.1                                       | 1663 | SD001130           | -7.0                                       | 1711 | SD002689           | -7.0                                       |
| 1616 | SD002848           | -7.1                                       | 1664 | SD001184           | -7.0                                       | 1712 | SD002784           | -7.0                                       |
| 1617 | SD002815           | -7.1                                       | 1665 | SD001201           | -7.0                                       | 1713 | SD002746           | -7.0                                       |
| 1618 | SD002807           | -7.1                                       | 1666 | SD001273           | -7.0                                       | 1714 | SD002709           | -7.0                                       |
| 1619 | SD002912           | -7.1                                       | 1667 | SD001336           | -7.0                                       | 1715 | SD002825           | -7.0                                       |
| 1620 | SD002904           | -7.1                                       | 1668 | SD001355           | -7.0                                       | 1716 | SD002876           | -7.0                                       |
| 1621 | SD002957           | -7.1                                       | 1669 | SD000136           | -7.0                                       | 1717 | SD002901           | -7.0                                       |
| 1622 | SD002958           | -7.1                                       | 1670 | SD001403           | -7.0                                       | 1718 | SD000283           | -7.0                                       |
| 1623 | SD002946           | -7.1                                       | 1671 | SD003214           | -7.0                                       | 1719 | SD002954           | -7.0                                       |
| 1624 | SD003426           | -7.1                                       | 1672 | SD001275           | -7.0                                       | 1720 | SD003427           | -7.0                                       |
| 1625 | SD003437           | -7.1                                       | 1673 | SD001405           | -7.0                                       | 1721 | SD002923           | -7.0                                       |
| 1626 | SD003099           | -7.1                                       | 1674 | SD001502           | -7.0                                       | 1722 | SD003000           | -7.0                                       |
| 1627 | SD000298           | -7.1                                       | 1675 | SD001504           | -7.0                                       | 1723 | SD002988           | -7.0                                       |
| 1628 | SD002619           | -7.1                                       | 1676 | SD001520           | -7.0                                       | 1724 | SD003110           | -7.0                                       |
| 1629 | SD003651           | -7.1                                       | 1677 | SD001470           | -7.0                                       | 1725 | SD003159           | -7.0                                       |
| 1630 | SD000353           | -7.1                                       | 1678 | SD000159           | -7.0                                       | 1726 | SD003152           | -7.0                                       |
| 1631 | SD003743           | -7.1                                       | 1679 | SD001662           | -7.0                                       | 1727 | SD000296           | -7.0                                       |

**Table S1.** *Continued.*

| No.  | SuperDRUG2<br>Code | Standard<br>Docking<br>Score<br>(kcal/mol) | No.  | SuperDRUG2<br>Code | Standard<br>Docking<br>Score<br>(kcal/mol) | No.  | SuperDRUG2<br>Code | Standard<br>Docking<br>Score<br>(kcal/mol) |
|------|--------------------|--------------------------------------------|------|--------------------|--------------------------------------------|------|--------------------|--------------------------------------------|
| 1728 | SD003157           | -7.0                                       | 1740 | SD003839           | -7.0                                       | 1751 | SD000450           | -7.0                                       |
| 1729 | SD000309           | -7.0                                       | 1741 | SD003860           | -7.0                                       | 1752 | SD000541           | -7.0                                       |
| 1730 | SD003484           | -7.0                                       | 1742 | SD003919           | -7.0                                       | 1753 | SD000456           | -7.0                                       |
| 1731 | SD003507           | -7.0                                       | 1743 | SD003898           | -7.0                                       | 1754 | SD000556           | -7.0                                       |
| 1732 | SD003499           | -7.0                                       | 1744 | SD003856           | -7.0                                       | 1755 | SD000613           | -7.0                                       |
| 1733 | SD003528           | -7.0                                       | 1745 | SD003770           | -7.0                                       | 1756 | SD000680           | -7.0                                       |
| 1734 | SD000340           | -7.0                                       | 1746 | SD006033           | -7.0                                       | 1757 | SD000766           | -7.0                                       |
| 1735 | SD003517           | -7.0                                       | 1747 | SD000053           | -7.0                                       | 1758 | SD000729           | -7.0                                       |
| 1736 | SD003520           | -7.0                                       | 1748 | SD006012           | -7.0                                       | 1759 | SD000736           | -7.0                                       |
| 1737 | SD003782           | -7.0                                       | 1749 | SD000047           | -7.0                                       | 1760 | SD000814           | -7.0                                       |
| 1738 | SD003787           | -7.0                                       | 1750 | SD000424           | -7.0                                       | 1761 | SD000739           | -7.0                                       |
| 1739 | SD003790           | -7.0                                       |      |                    |                                            |      |                    |                                            |
